# Supplementary material for: Colour-tuning of multiple resonance thermally activated delayed fluorescence emitters for hyperfluorescence with long-lifetime device characteristics
Source: Royal Society of Chemistry journal article supplement (doi:10.1039/d3tc04495e), 2024-01-01
Supplement: d3tc04495e1.pdf [file d3tc04495e1.pdf]

## Supporting information

**Tae Hoon Ha, Jeong Yeol Yoo, Seung Wan Kang and Chil Won Lee\***

*Department of Chemistry, Dankook University, Cheonan 31116, Korea*

**\*Corresponding author. Email: [chili@dankook.ac.kr](mailto:chili@dankook.ac.kr); Fax: +82-31-8021-7218.**

◆  $^1\text{H}$  and  $^{13}\text{C}$  NMR spectra and GC-Mass data

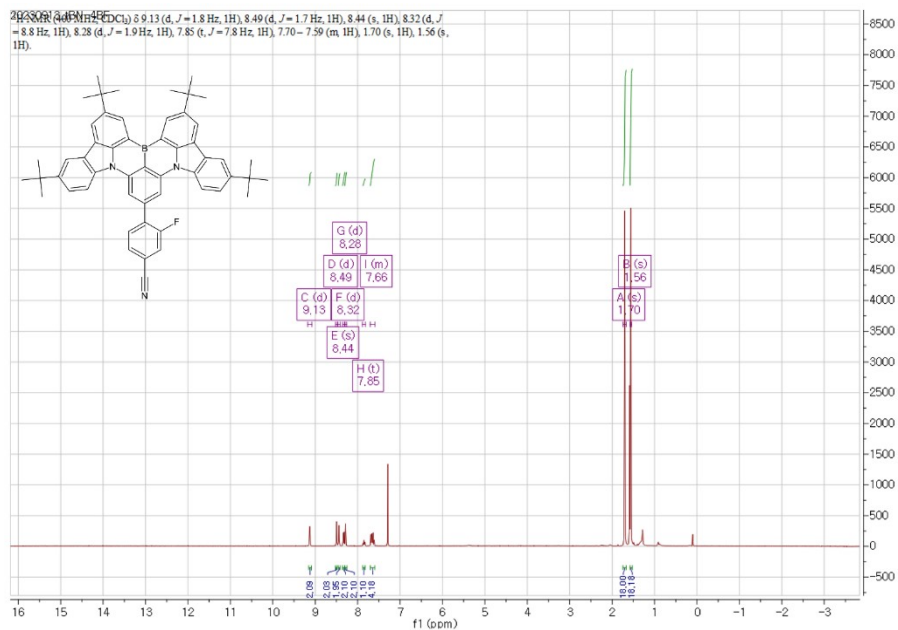

Fig. S1.  $^1\text{H}$ -NMR of tBN-4BF

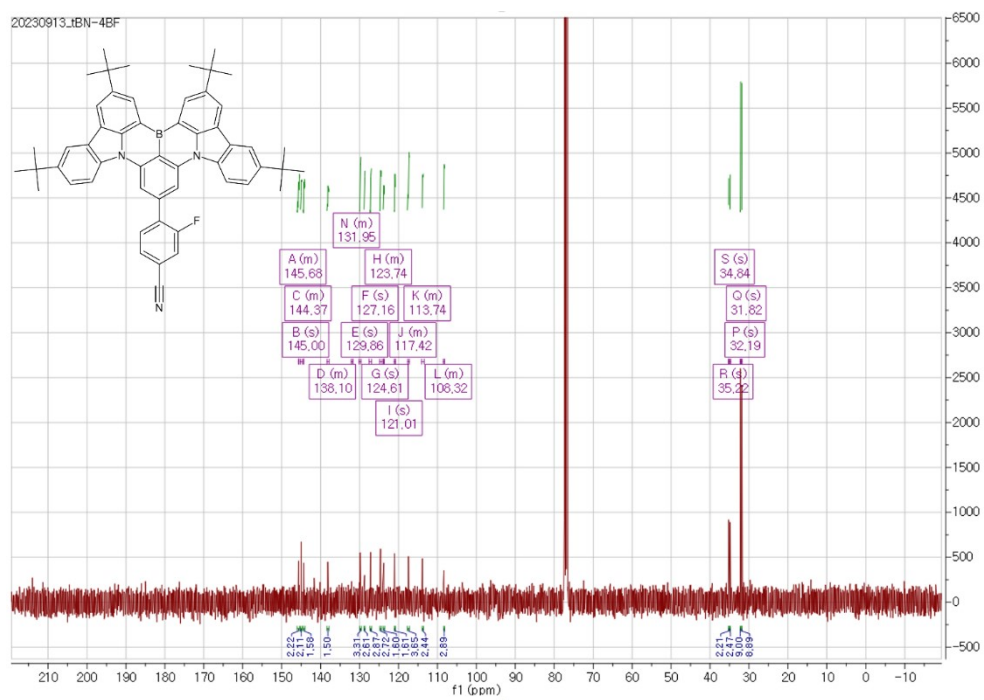

Fig. S2.  $^{13}\text{C}$ -NMR of tBN-4BF

[ Mass Spectrum ]  
 Data : FAB-F566 Date : 27-Sep-2023 16:44  
 RT : 0.31 min Scan# : (9,16)  
 Elements : C 100/0, H 100/0, F 2/0, N 5/0, 10B 2/0, 11B 2/0  
 Mass Tolerance : 10ppm, 5mmu if m/z < 500, 10mmu if m/z > 1000  
 Unsaturation (U.S.) : 20.0 - 40.0

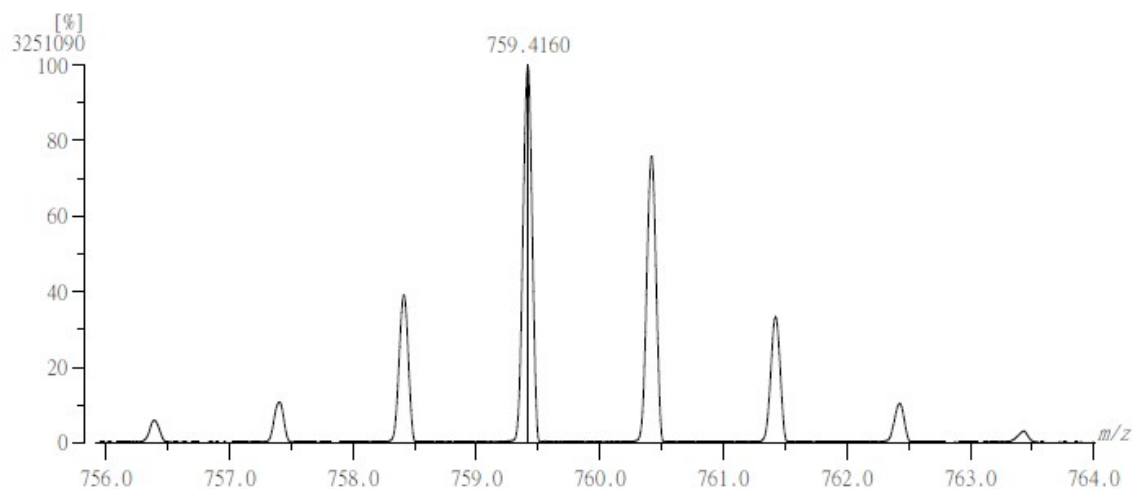

| Observed m/z | Int%   | Err [ppm / mmu] | U.S. | Composition             |
|--------------|--------|-----------------|------|-------------------------|
| 1 759.4160   | 100.00 | +6.0 / +4.5     | 30.5 | C55 H52 F N2            |
| 2            |        | +6.3 / +4.7     | 27.0 | C50 H51 F2 N5           |
| 3            |        | +9.5 / +7.2     | 30.0 | C55 H51 F2 10B          |
| 4            |        | +1.2 / +0.9     | 33.5 | C57 H51 N 10B           |
| 5            |        | +1.5 / +1.1     | 30.0 | C52 H50 F N4 10B        |
| 6            |        | +4.9 / +3.7     | 29.5 | C52 H49 F2 N2 10B2      |
| 7            |        | -3.3 / -2.5     | 33.0 | C54 H49 N3 10B2         |
| 8            |        | -0.3 / -0.2     | 33.5 | C58 H52 11B             |
| 9            |        | -0.0 / -0.0     | 30.0 | C53 H51 F N3 11B        |
| 10           |        | +3.5 / +2.6     | 29.5 | C53 H50 F2 N 10B 11B    |
| 11           |        | -4.8 / -3.6     | 33.0 | C55 H50 N2 10B 11B      |
| 12           |        | -4.5 / -3.4     | 29.5 | C50 H49 F N5 10B 11B    |
| 13           |        | -1.3 / -1.0     | 32.5 | C55 H49 F 10B2 11B      |
| 14           |        | -1.1 / -0.8     | 29.0 | C50 H48 F2 N3 10B2 11B  |
| 15           |        | -9.3 / -7.1     | 32.5 | C52 H48 N4 10B2 11B     |
| 16           |        | +7.2 / +5.5     | 33.0 | C51 H46 N5 10B2 11B     |
| 17           |        | +2.0 / +1.5     | 29.5 | C54 H51 F2 11B2         |
| 18           |        | -6.3 / -4.8     | 33.0 | C56 H51 N 11B2          |
| 19           |        | -6.0 / -4.6     | 29.5 | C51 H50 F N4 11B2       |
| 20           |        | -2.5 / -1.9     | 29.0 | C51 H49 F2 N2 10B 11B2  |
| 21           |        | +5.8 / +4.4     | 33.0 | C52 H47 N4 10B 11B2     |
| 22           |        | -7.3 / -5.6     | 32.0 | C53 H48 F N 10B2 11B2   |
| 23           |        | +9.2 / +7.0     | 32.5 | C52 H46 F N2 10B2 11B2  |
| 24           |        | -7.1 / -5.4     | 28.5 | C48 H47 F2 N4 10B2 11B2 |
| 25           |        | +9.5 / +7.2     | 29.0 | C47 H45 F2 N5 10B2 11B2 |

Fig. S3. GC-HRMS of tBN-4BF

◆ Device structure

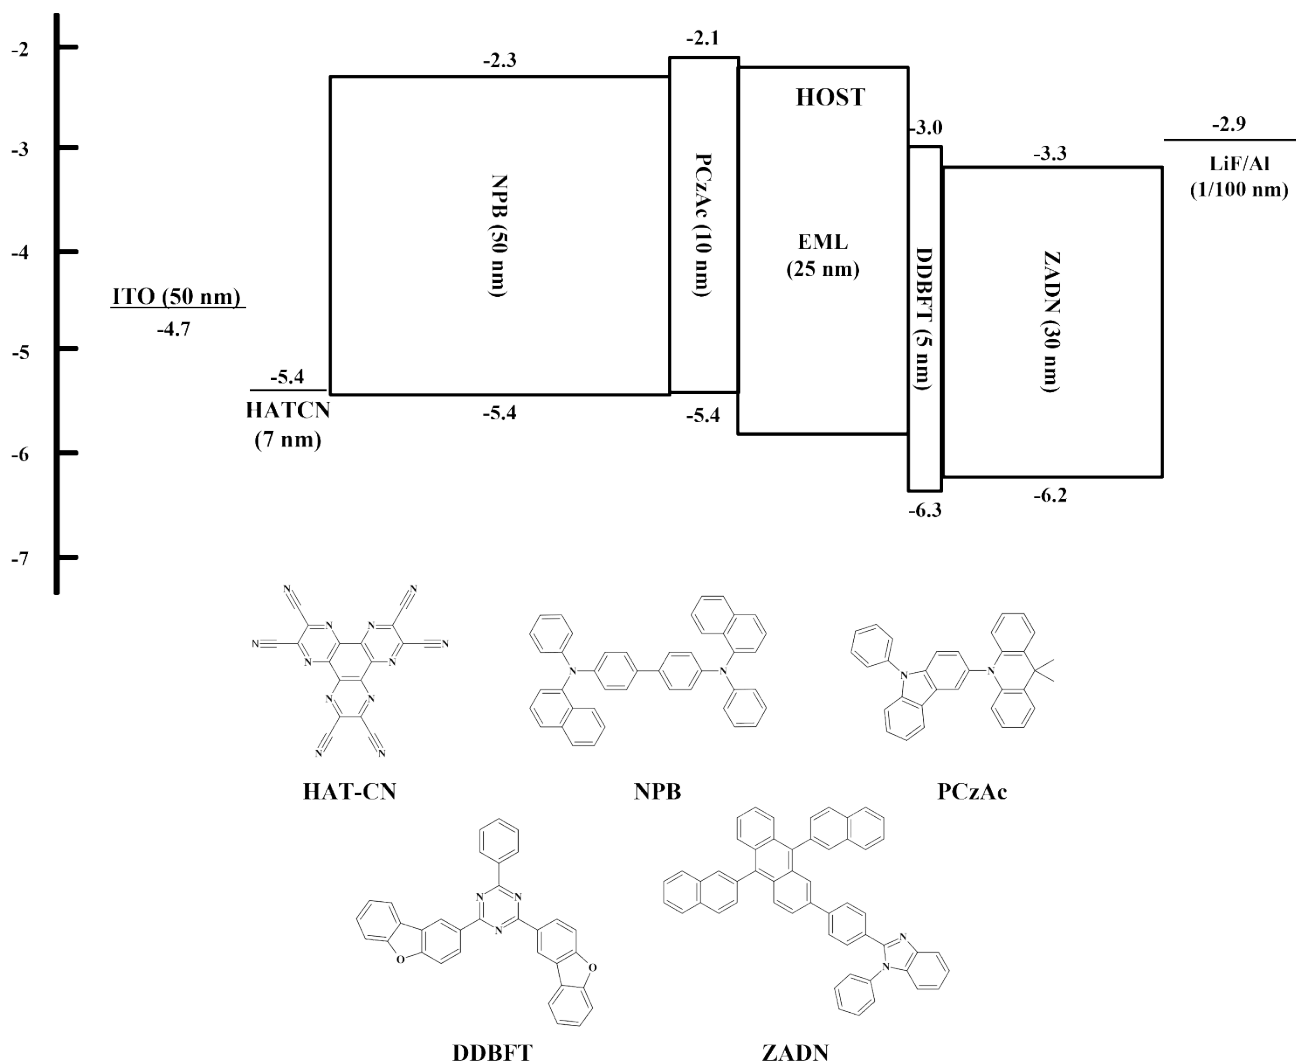

**Fig. S4.** Energy level diagram in Device A.

In this work, 1, and 3 wt% doped tBN-4BF device were prepared with Device A which TADF sensitizer is 0 wt%, and HF device were prepared with Device A which TADF sensitizer is 20 wt% ;

Where EML is composed of;

Device A1 : 4CzIPN + tBN-4BF 1 wt%

Device A2 : 4CzIPN + tBN-4BF 3 wt%

Device A3 : TCz-4mCNT rz + tBN-4BF 1 wt%

Device A4 : TCz-4mCNTrz + tBN-4BF 3 wt%

**Device A:** To investigate the lifetimes performance of the 4CzIPN and TCz-4mCNTrz we fabricated the device with structure of ITO (50 nm) / HAT-CN (7 nm) / NPB (10 nm) / PCzAC (10 nm) / PIC-Trz + TADF sensitizer (0, 20 wt%) + tBN-4BF(1, 3 wt%) (20 wt%) (25 nm) / DDBFT (5 nm) / ZADN (40 nm) / LiF (1 nm) / Al (100 nm). In these devices, 1,4,5,8,9,11-Hexaazatriphenylenehexacarbonitrile (HAT-CN) as hole-injecting layer (HIL), *N,N'*-Di(1-naphthyl)-*N,N'*-diphenyl-(1,1'-biphenyl)-4,4'-diamine (NPB) as hole-transporting layer (HTL), 9,10-Dihydro-9,9-dimethyl-10-(9-phenyl-9*H*-carbazol-3-yl)-acridine (PCzAC) as electron-blocking layer (EBL), 2,4-Bis(dibenzo[*b,d*]furan-2-yl)-6-phenyl-1,3,5-triazine (DDBFT) as hole-blocking layer (HBL), and 2,2,2''<sup>2</sup>-[4-(9,10-Di-naphthalen-2-yl-anthracen-2-yl)-phenyl]-1-phenyl-1*H*-benzoimidazole (ZADN) as electron-transporting layer (ETL).

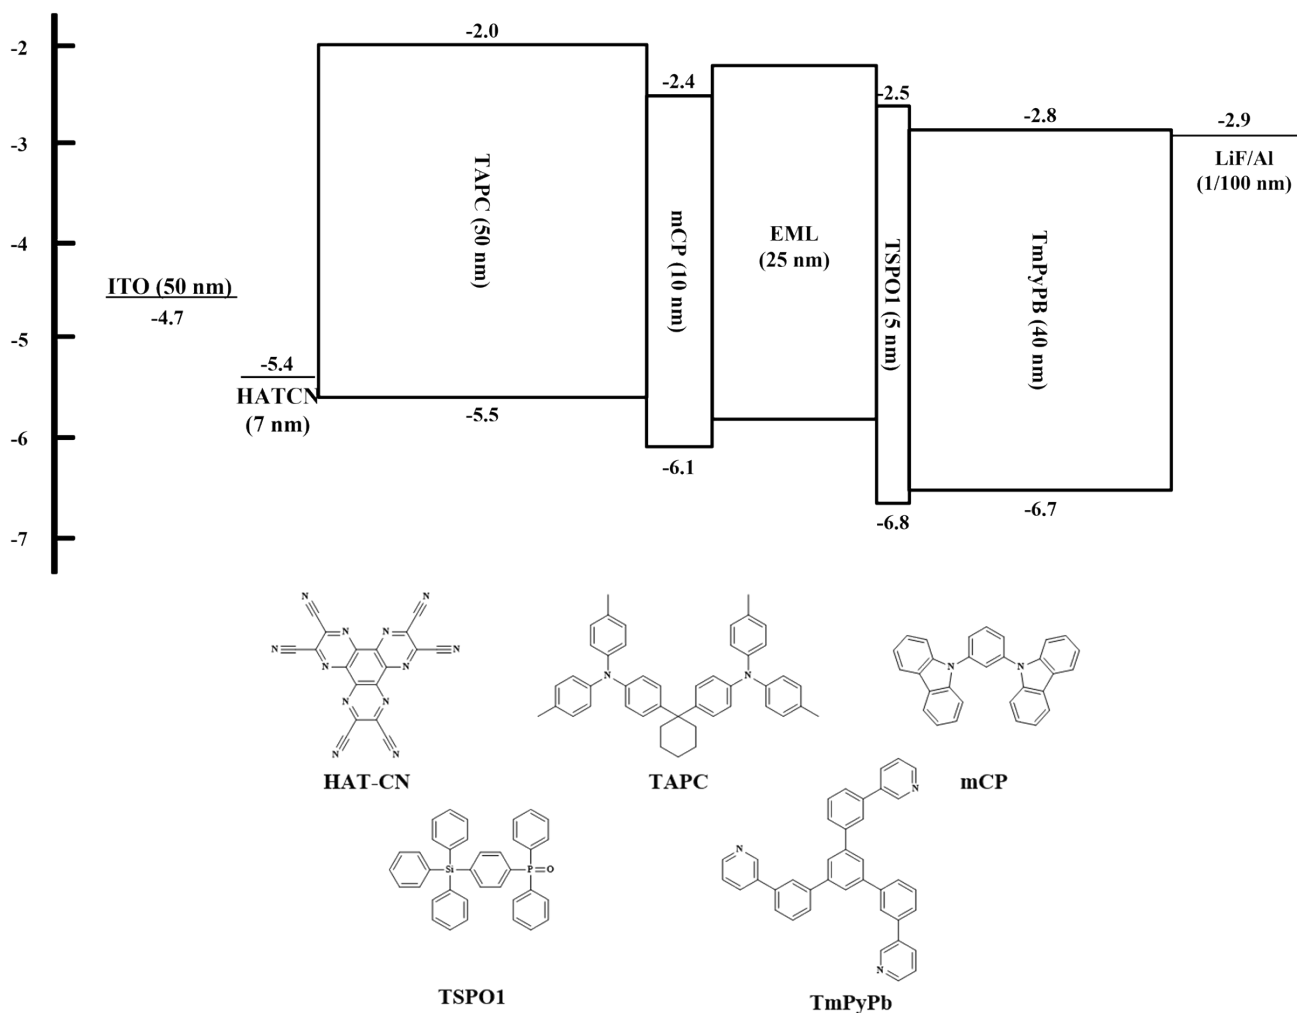

**Fig. S5.** Energy level diagram in Device B.

**Device B:** To investigate the efficiency device performance of the TCz-2mCNTrz, TCz-4mCNTrz and TCz-pCNTrz, we fabricated the device with structure of ITO (50 nm) / HAT-CN (7 nm) / TAPC (50nm) / mCP (10 nm) / PIC-Trz + TADF sensitizer (20 wt%) + tBN-4BF(1, 3 wt%) (25 nm) / TSPO1 (5 nm) / TmPyPB (40 nm) / LiF (1 nm) / Al (100 nm). In these devices, 1,4,5,8,9,11-Hexaazatriphenylenehexacarbonitrile (HAT-CN) as hole-injecting layer (HIL), 4,4'-Cyclohexylidenebis[*N,N*-bis(4-methylphenyl)benzenamine] (TAPC) as hole-transporting layer (HTL), 1,3-bis(9*H*-carbazolyl)benzene (mCP) as electron-blocking layer (EBL), diphenyl[4-

(triphenylsilyl)phenyl]phosphine oxide (TSPO1) as hole-blocking layer (HBL), and 2,2',2'' 1,3,5-Tris(3-pyridyl-3-phenyl)benzene (TmPyPB) as electron-transporting layer (ETL).

Where EML is composed of;

Device B1 : TCz-4mCNTrz + tBN-4BF 1 wt%

Device B2 : TCz-4mCNTrz + tBN-4BF 3 wt%

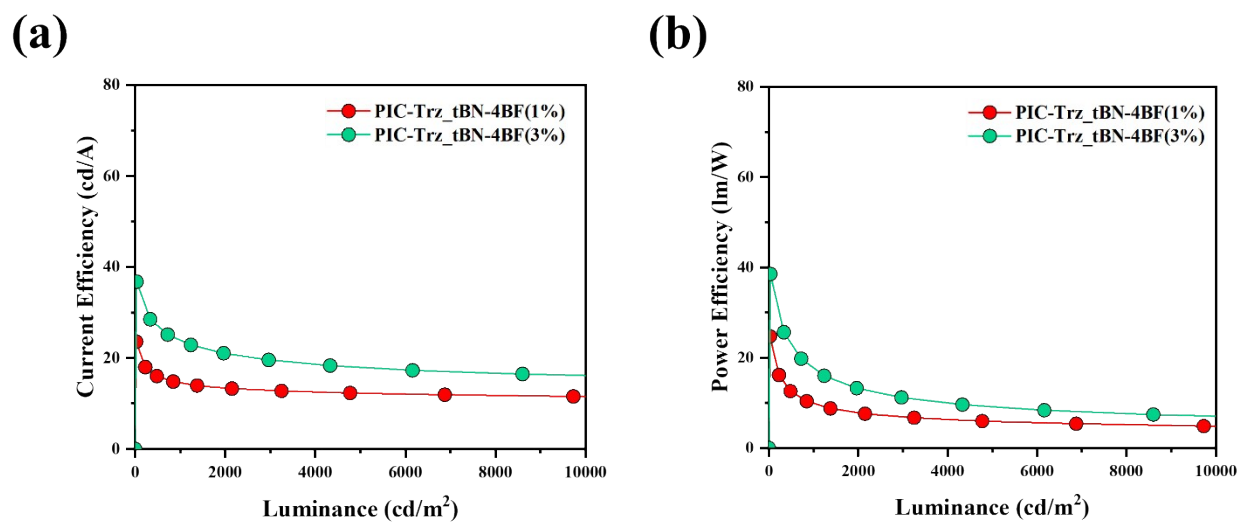

**Fig. S6.** Device performance of 1, 3 wt% tBN-4BF doped in PIC-Trz (a) The CE - Luminance curves (b)

The PE – Luminance curves.

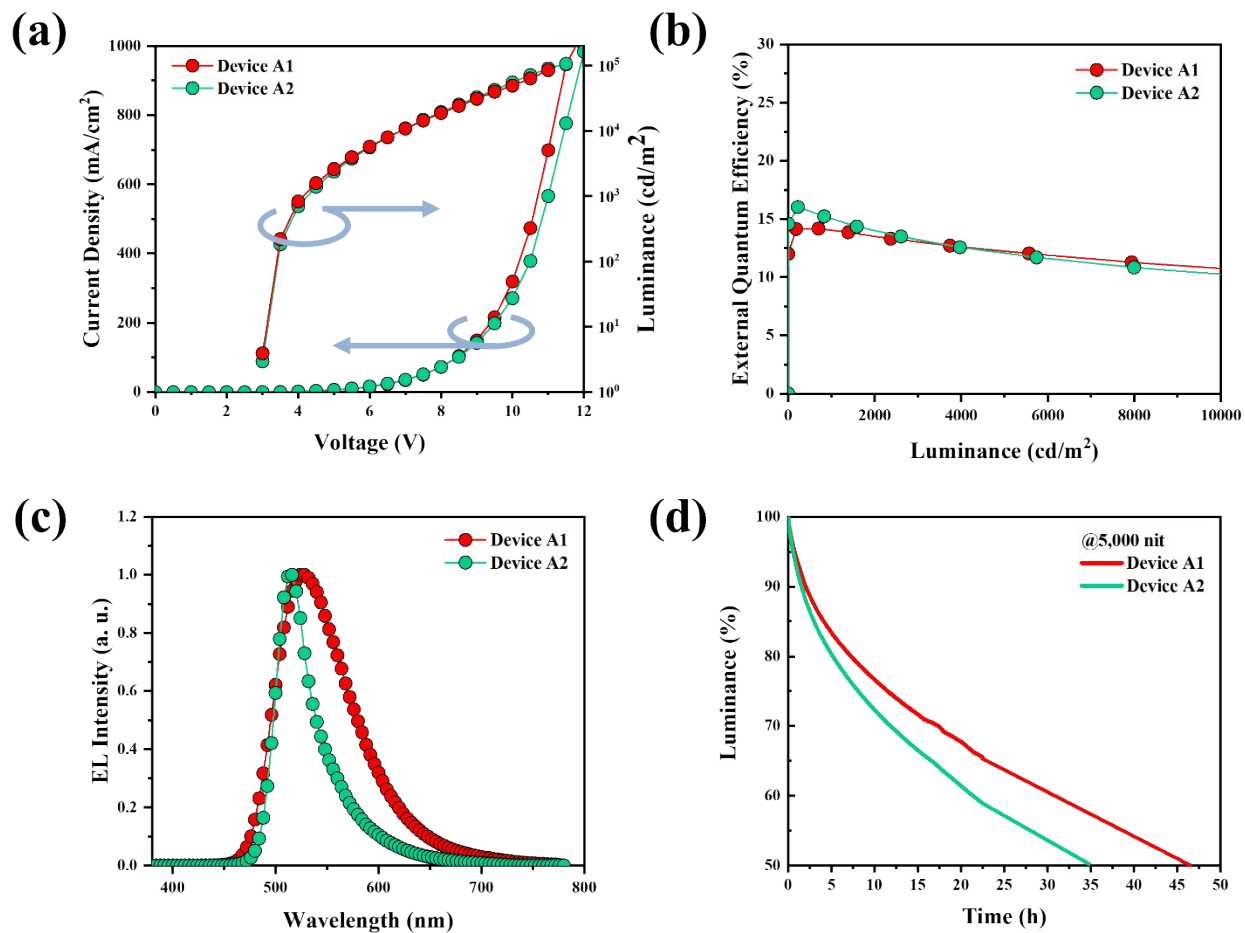

**Fig. S7.** Device performance of HF device (where TADF sensitizer is 4CzIPN with Device A) (a) The current density-voltage-luminance (J-V-L) curves (b) The EQE-Luminance-Current efficiency curves (c) Normalized EL intensities at the current density of 1,000 nit (d) device lifetime curves at an initial luminance 5,000 nit.



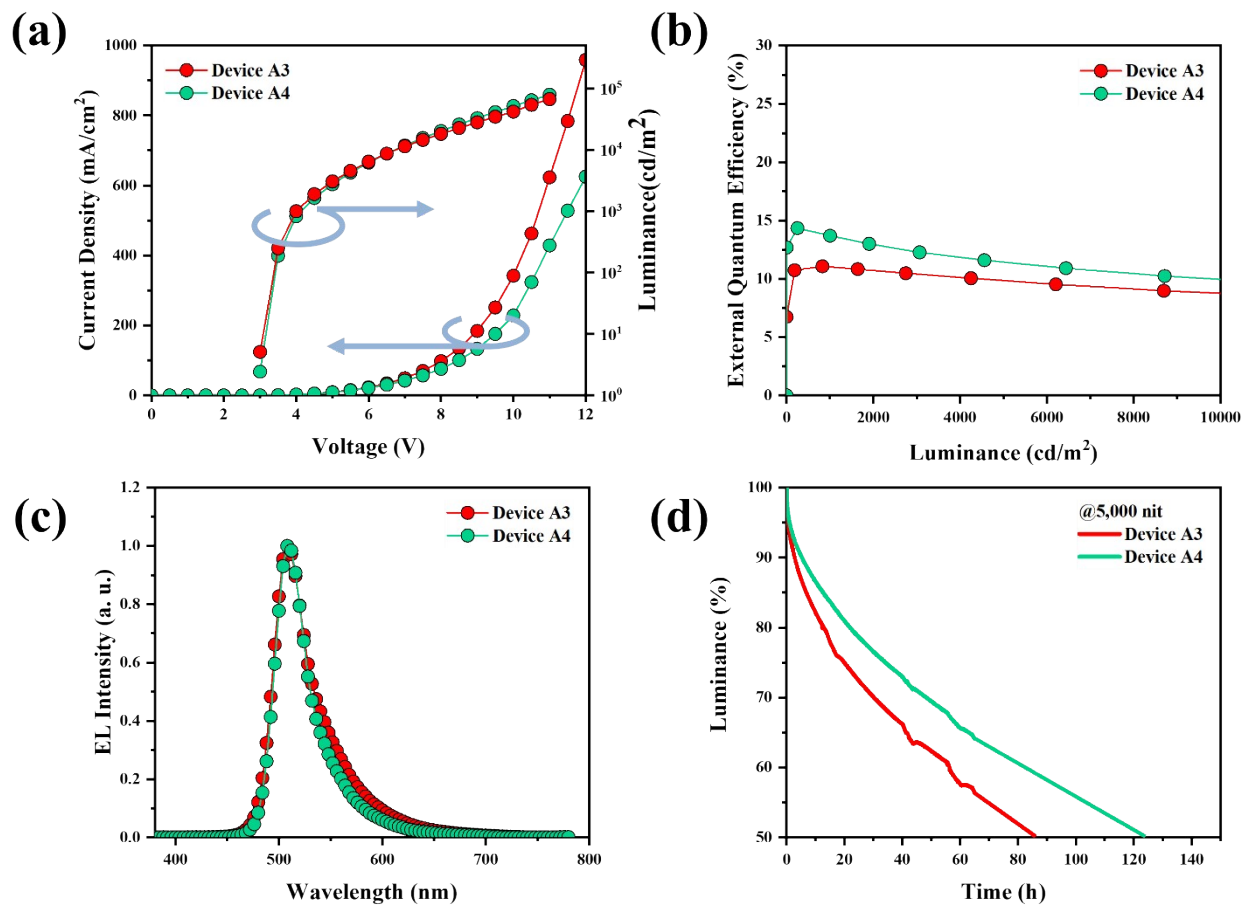

**Fig. S8.** Device performance of HF device (where TADF sensitizer is TCz-4mCNTrz with Device A) (a) The current density-voltage-luminance (J-V-L) curves (b) The EQE-Luminance-Current efficiency curves (c) Normalized EL intensities at the current density of 1,000 nit (d) device lifetime curves at an initial luminance 5,000 nit.

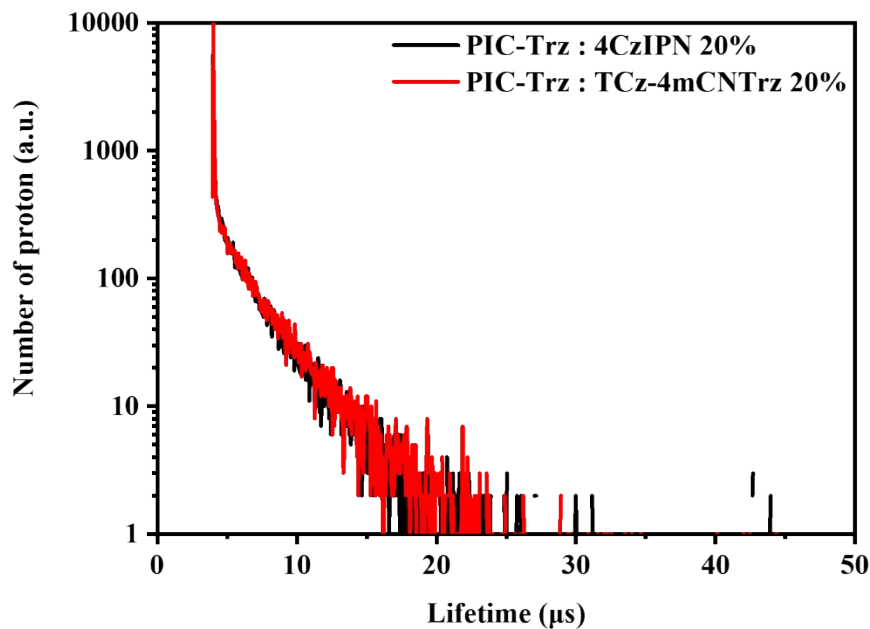

**Fig. S9.** Transient PL decay spectra of doped films(20 wt% doping concentration) of 4CzIPN, and TCz-4mCNTrz with PIC-Trz as the host

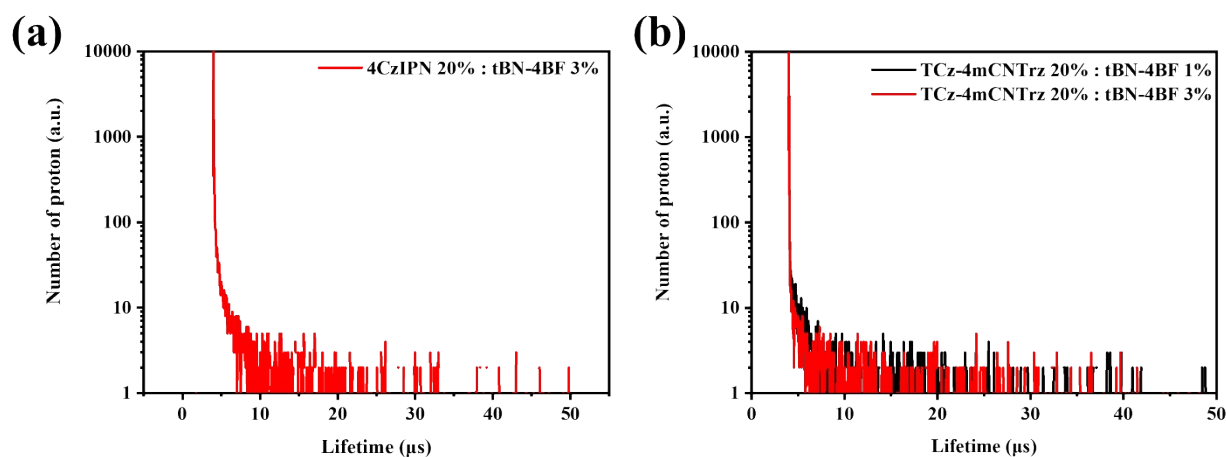

**Fig. S10.** Transient PL decay spectra of doped films(1, 3 wt % of tBN-4BF and 20 wt% of TADF sensitizer with PIC-Trz as the host)

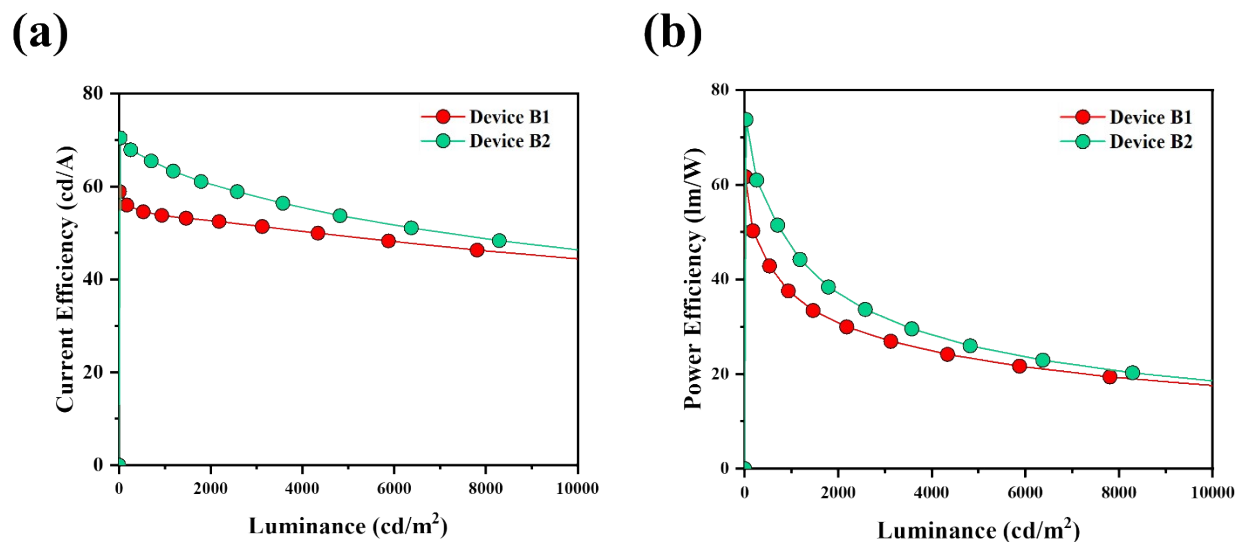

**Fig. S11.** Device performance of Device B1~2 (a) The CE - Luminance curves (b) The PE – Luminance curves.

**Table S1.** Transient PL properties of doped film of tBN-4BF with PIC-Trz host.

| Material | $\tau_p$<br>(ns) <sup>(a)</sup> | $\tau_d$<br>( $\mu$ s) <sup>(b)</sup> | $A_1$ <sup>(c)</sup> | $A_2$ <sup>(d)</sup> | Total   |
|----------|---------------------------------|---------------------------------------|----------------------|----------------------|---------|
| 1 wt%    | 9.00                            | 5.30                                  | 15745.1              | 14540.9              | 30295.5 |
| 3 wt%    | 11.0                            | 3.86                                  | 17997.3              | 12094.5              | 30094.1 |

<sup>a</sup>Prompt fluorescence lifetime of the TADF materials; <sup>b</sup>Delayed fluorescence lifetime of the TADF materials; <sup>c</sup>Prompt components of integrating the transient PL curves; <sup>d</sup>Delayed components of integrating the transient PL curves

**Table S2.** PLQYs and transient PL properties of doped film of 4CzIPN and TCz-4mCNTrz with PIC-Trz host.

| Material | $\tau_p$<br>(ns) <sup>(a)</sup> | $\tau_d$<br>( $\mu$ s) <sup>(b)</sup> | $\Phi_{\text{Total}}$<br>(%) | $\Phi_{\text{F}}$<br>(%) <sup>(c)</sup> | $\Phi_{\text{TADF}}$<br>(%) <sup>(d)</sup> | $k_p$<br>( $10^7$ ) | $k_D$<br>( $10^5$ ) | $k_r^S$<br>( $10^7$ ) | $k_{nr}^T$<br>( $10^5$ ) | $k_{\text{ISC}}$<br>( $10^7$ ) | $k_{\text{RISC}}$<br>( $10^5 \text{ s}^{-1}$ ) <sup>(e)</sup> |
|----------|---------------------------------|---------------------------------------|------------------------------|-----------------------------------------|--------------------------------------------|---------------------|---------------------|-----------------------|--------------------------|--------------------------------|---------------------------------------------------------------|
|          |                                 |                                       |                              |                                         |                                            |                     |                     |                       |                          |                                |                                                               |

|             | $s^{-1}(e)$ | $s^{-1}(f)$ | $s^{-1}(g)$ | $s^{-1}(h)$ | $s^{-1}(i)$ | $s^{-1}(j)$ | $s^{-1}(k)$ | $s^{-1}(l)$ | $s^{-1}(m)$ | $s^{-1}(n)$ | $s^{-1}(o)$ |
|-------------|-------------|-------------|-------------|-------------|-------------|-------------|-------------|-------------|-------------|-------------|-------------|
| 4CzIPN      | 36.6        | 2.69        | 95.5        | 51.0        | 40.2        | 2.73        | 3.71        | 1.39        | 0.66        | 1.33        | 5.98        |
| TCz-4mCNTrz | 29.1        | 2.55        | 90.3        | 56.6        | 25.0        | 3.43        | 3.92        | 1.94        | 1.66        | 1.49        | 3.98        |

<sup>a</sup>Prompt fluorescence lifetime of the TADF materials; <sup>b</sup>Delayed fluorescence lifetime of the TADF materials; <sup>c</sup>Prompt components of the PLQYs were calculated by integrating the transient PL curves; <sup>d</sup>Delayed components of PLQYs; <sup>e</sup>Rate constant of prompt components; <sup>f</sup>Rate constant of delay components; <sup>g</sup>Radiative decay rate; <sup>h</sup>Nonradiative decay rate; <sup>i</sup>Rate constants for ISC; <sup>j</sup>Rate constants for RISC

**Table S3. Transient PL properties of doped film of 4CzIPN and TCz-4mCNTrz with PIC-Trz host.**

| Material    | $\tau_p$<br>(ns) <sup>(a)</sup> | $\tau_d$<br>( $\mu$ s) <sup>(b)</sup> | $A_1$ <sup>(c)</sup> | $A_2$ <sup>(d)</sup> | Total   |
|-------------|---------------------------------|---------------------------------------|----------------------|----------------------|---------|
| 4CzIPN      | 36.6                            | 2.69                                  | 30346.4              | 26356.4              | 56850.1 |
| TCz-4mCNTrz | 29.1                            | 2.55                                  | 44021.8              | 26101.5              | 70273.3 |

<sup>a</sup>Prompt fluorescence lifetime of the TADF materials; <sup>b</sup>Delayed fluorescence lifetime of the TADF materials; <sup>c</sup>Prompt components of integrating the transient PL curves; <sup>d</sup>Delayed components of integrating the transient PL curves

**Table S4. PLQYs and transient PL properties of Device A2~4.**

| Film      | TADF sensitizer ratio (wt%) | tBN-4BF ratio (wt%) | $\tau^{HF}_p$ (ns) <sup>(a)</sup> | $\tau^{HF}_d$ ( $\mu$ s) <sup>(b)</sup> | $\Phi_{Total}$ (%) |
|-----------|-----------------------------|---------------------|-----------------------------------|-----------------------------------------|--------------------|
| Device A2 | 4CzIPN                      | 3                   | 13.5                              | 0.35                                    | 90.3               |

|        |         |   |      |      |      |
|--------|---------|---|------|------|------|
| Device | TCz-    |   |      |      |      |
| A3     | 4mCNTrz | 1 | 11.4 | 0.49 | 97.9 |
| Device | TCz-    |   |      |      |      |
| A4     | 4mCNTrz | 3 | 11.9 | 0.81 | 95.5 |

<sup>a</sup>Prompt fluorescence lifetime of the TADF materials; <sup>b</sup>Delayed fluorescence lifetime of the TADF materials.

**Table S5.** FRET and DET calculation summary between TADF sensitizer(4CzIPN, and TCz-4mCNTrz), and tBN-4BF.

| Film      | TADF sensitizer ratio (wt%) | tBN-4BF ratio (wt%) | $J$ ( $10^{-25} \text{ m}^2$ ) <sup>(a)</sup> | $R_0$ (nm) <sup>(b)</sup> | $\Phi_{\text{FET}}$ (%) <sup>(c)</sup> | $k_{\text{FET}}$ ( $10^7 \text{ s}^{-1}$ ) <sup>(d)</sup> | $k_{\text{DET}}$ ( $10^6 \text{ s}^{-1}$ ) <sup>(e)</sup> |
|-----------|-----------------------------|---------------------|-----------------------------------------------|---------------------------|----------------------------------------|-----------------------------------------------------------|-----------------------------------------------------------|
| Device A2 | 4CzIPN                      | 3                   | 7.28                                          | 3.99                      | 53.6                                   | 3.97                                                      | 23.7                                                      |
| Device A3 | TCz-4mCNTrz                 | 1                   | 5.68                                          | 3.82                      | 68.8                                   | 6.03                                                      | 14.6                                                      |
| Device A4 | TCz-4mCNTrz                 | 3                   | 5.68                                          | 3.82                      | 67.4                                   | 5.67                                                      | 6.64                                                      |

<sup>a</sup>Overlap integral between the UV-vis spectra of tBN-4BF and PL spectra of all TADF sensitizers; <sup>b</sup>Förster energy transfer radii; <sup>c</sup>Efficient of Förster energy transfer; <sup>d</sup>Rate constants for Förster energy transfer; <sup>e</sup>Rate constant of Dexter energy transfer.

**Table S6.** The weakest bond dissociation energy values of calculated at anion, and cation state for 4CzIPN, and TCz-4mCNTrz.

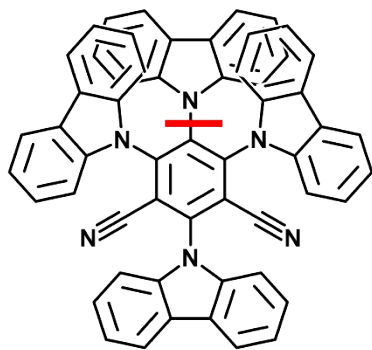

**4CzIPN**

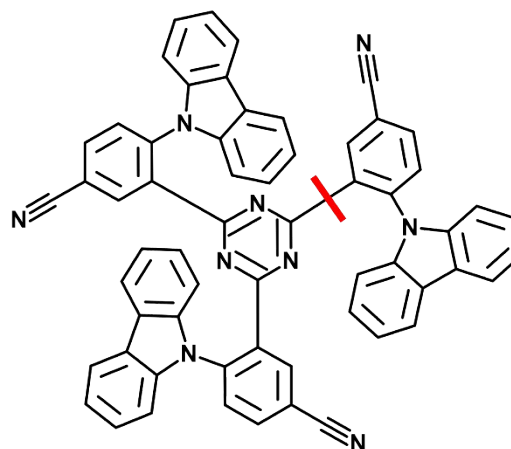

**TCz-4mCNTrz**

| TADF materials | Anion BDE<br>(eV) | Cation<br>BDE<br>(eV) | Ref. |
|----------------|-------------------|-----------------------|------|
| 4CzIPN         | 1.78              | 3.87                  | [7]  |
| TCz-4mCNTrz    | 3.15              | 4.17                  | [8]  |

◆ **Equation**

The rate constants of ISC( $k_{ISC}$ ) and RISC( $k_{RISC}$ ) of tBN-4BF based on the following equations [1-3] :

$$k_p = 1/\tau_p \dots\dots\dots(1)$$

$$k_r^S = \Phi_p/k_p \dots\dots\dots(2)$$

$$k_{TADF} = 1/\tau_d \dots\dots\dots(3)$$

$$k_{nr}^T = k_{TADF} - \Phi_p \times k_{RISC} \dots\dots\dots(4)$$

$$k_{ISC} = (1 - \Phi_p) / \tau_p \dots\dots\dots(5)$$

$$k_{RISC} = (k_p \times k_{TADF} \times \Phi_{TADF}) / (k_{ISC} \times \Phi_p) \dots\dots\dots(6)$$

where,  $k_p$  is rate of prompt components,  $k_{TADF}$  is rate of delay components,  $k_r^s$  is rate of radiative decay on the singlet excited state to ground state,  $k_{nr}^T$  is rate of non-radiative decay on the triplet excited state to ground state,  $k_{ISC}$  is rate of ISC,  $k_{RISC}$  is rate of RISC,  $\Phi_p$  is prompt PLQY, and  $\Phi_{TADF}$  is delayed PLQY.

**Eq. S1.** Exciton Lifetime and Rate Constant equation.

By assuming (i)  $k_{PF} \gg k_{DF}$  and (ii)  $(k_r^S, k_{ISC}$  and  $k_{FET}) \gg (k_{nr}^S, k_r^T, k_{nr}^T$  and  $k_{DET})$ , the average  $k_{FET}$  and  $k_{DET}$  can be calculated by Eq. S2 (5), (6), and (7);

$$R_0 = [(9(\ln 10)k^2\Phi_{TADF}) \times J / (128\pi^5 N_A \eta^4)]^{1/6} \dots\dots\dots(1)$$

$$\Phi_{FRET} = 1 - (\tau_p^{HF} / \tau_p^{TADF}) \dots\dots\dots(2)$$

$$k_{FRET} = \Phi_{FRET} / \tau_p^{HF} \dots\dots\dots(3)$$

$$k_{DET} = 1 / \tau_d^{HF} - 1 / \tau_d + k_{RISC} \times k_{ISC} \times (\tau_p^{HF} - \tau_p) \dots\dots\dots(4)$$

where,  $k^2$  is the dipole-dipole interaction(in this study 2/3 was used which is the value for a random distribution),  $N_A$  is the Avogadro constant,  $\eta$  is the refractive index of the film.[4-6]

**Eq. S2.** Equation of Förster energy transfer radius and rate constant of Förster resonance energy transfer.

◆ **Reference**

- [1] R. Pei, J. Lou, G. Li, H. Liu, X. Yin, C. Zhou, Z. Wang, and C. Yang, *Chemical Engineering Journal* **2022**, 437, 135222
- [2] J. Huang, H. Nie, J. Zeng, Z. Zhuang, S. Gan, Y. Cai, J. Guo, S. Su, Z. Zhao, and B. Z. Tang, *Angew. Chem. Int. Ed* **2017**, 56, 12971-12976
- [3] D. Zhou, G. S. M. Tong, G. Chen, Y. Tang, W. Liu, D. Ma, L. Du, J. Chen, and C. Che, *Adv. Mater.* **2022**, 34, 2206598
- [4] W. Xie, X. Peng, M. Li, W. Qiu, W. Li, Q. Gu, Y. Jiao, Z. Chen, Y. Gan, K. K. Liu, and S. su, *Adv. Optical Mater.* **2022**, 10, 2200665
- [5] K. Stavrou, L. G. Franca, A. Danos, and A. Monkman, *Chemrxiv*. **2023**, "Understanding the Key Requirements for Ultra-Efficient Sensitisation in Hyperfluorescence OLEDs."
- [6] J. Liu, J. Liu, H. Li, Z. Bin, and J. You, *Angew. Chem. Int. Ed.* **2023**, 62, e202306471
- [7] Y. H. Jung, D. Karthik, H. Lee, J. H. Maeng, K. J. Yang, S. Hwang, and J. H. Kwon, *ACS Appl. Mater. Interfaces* **2021**, 13, 17882-17891
- [8] J. Yoo, Y. Choi, K. W. Kim, T. H. Ha, and C. W. Lee, *Dyes and Pigments* **2023**, 214, 111200
